# Supplementary material for: Pilot scale study of sequencing batch reactor (SBR) retrofit with integrated fixed film activated sludge (IFAS): nitrogen removal and design consideration
Source: Royal Society of Chemistry journal article supplement (doi:10.1039/c7ew00337d), 2018-01-01
Supplement: c7ew00337d1.pdf [file c7ew00337d1.pdf]

## **SUPPORTING INFORMATION**

### **Pilot Scale Study of Sequencing Batch Reactor (SBR) Retrofit with Integrated Fixed Film Activated Sludge (IFAS): Nitrogen Removal and Design Consideration**

Renzun Zhao<sup>a,b,c,\*</sup>, Hong Zhao<sup>b</sup>, Rich Dimassimo<sup>b</sup>, Guoren Xu<sup>a\*</sup>

a, State Key Laboratory of Urban Water Resource and Environment, Harbin Institute of  
Technology, Harbin, China 150090

b, Veolia Water Solution and Technology - Kruger Inc., Cary, NC 27513

c, Civil and Environmental Engineering Department, Lamar University, Beaumont, TX  
77710

\*: Corresponding authors.

Corresponding contact: phone: +01-409-880-8058; fax: +01-409-880-8121; email:

renzun@vt.edu, renzun.zhao@lamar.edu

## Materials and Methods

Statistical analysis was conducted with Stata/MP 14.0 (College Station, TX).

## Results

1. Comparison of  $\text{NH}_4^+$ -N removal efficiencies in phase 2 and phase 1.

Data:

| Phase 2 | Phase 1 |
|---------|---------|
| 95%     | 95%     |
| 96%     | 96%     |
| 75%     | 98%     |
| 93%     | 100%    |
| 77%     | 100%    |
| 80%     | 100%    |
| 79%     | 98%     |
| 75%     | 99%     |
| 96%     | 96%     |
| 94%     | 98%     |

Stata Results:

| Two-sample t test with unequal variances |     |                                              |           |                    |               |           |
|------------------------------------------|-----|----------------------------------------------|-----------|--------------------|---------------|-----------|
| Variable                                 | Obs | Mean                                         | Std. Err. | Std. Dev.          | [95%<br>Conf. | Interval] |
| phase2                                   | 10  | 0.86                                         | 0.0298515 | 0.0943987          | 0.7924713     | 0.9275287 |
| phase1                                   | 10  | 0.98                                         | 0.0057735 | 0.0182574          | 0.9669394     | 0.9930606 |
| combined                                 | 20  | 0.92                                         | 0.0202094 | 0.0903793          | 0.8777012     | 0.9622988 |
| diff                                     |     | -0.12                                        | 0.0304047 |                    | 0.1880582     | 0.0519418 |
| diff = mean(phase2) - mean(phase1)       |     |                                              |           | t = -3.9468        |               |           |
| Ho: diff = 0                             |     | Satterthwaite's degrees of freedom = 9.67238 |           |                    |               |           |
| Ha: diff < 0                             |     | Ha: diff != 0                                |           | Ha: diff > 0       |               |           |
| Pr(T < t) = 0.0015                       |     | Pr( T  >  t ) = 0.0029                       |           | Pr(T > t) = 0.9985 |               |           |

## 2. Comparison of TIN removal efficiencies in phase 1, 2, and 3.

Data:

| TIN removal efficiency |         |         |
|------------------------|---------|---------|
| Phase 3                | Phase 1 | Phase 2 |
| 69.30%                 | 59%     | 64%     |
| 80%                    | 60%     | 68%     |
| 78.70%                 | 47%     | 45%     |
| 83.30%                 | 42%     | 70%     |
| 79%                    | 46%     | 49%     |
| 78.30%                 | 47%     | 58%     |
| 73%                    | 23%     | 58%     |
| 69.30%                 | 50%     | 55%     |
| 81.30%                 | 52%     | 69%     |
|                        | 48%     | 65%     |

Stata Results:

### 2.1 Phase 3 and 1.

|                                          |     |                                            |           |                    |               |           |
|------------------------------------------|-----|--------------------------------------------|-----------|--------------------|---------------|-----------|
| phase 3 and phase1                       |     |                                            |           |                    |               |           |
| Two-sample t test with unequal variances |     |                                            |           |                    |               |           |
| Variable                                 | Obs | Mean                                       | Std. Err. | Std. Dev.          | [95%<br>Conf. | Interval] |
| phase3                                   | 9   | 0.7677778                                  | 0.0172222 | 0.0516667          | 0.7280633     | 0.8074923 |
| phase1                                   | 10  | 0.474                                      | 0.0324619 | 0.1026537          | 0.400566      | 0.547434  |
| combined                                 | 19  | 0.6131579                                  | 0.0391806 | 0.1707842          | 0.5308425     | 0.6954733 |
| diff                                     |     | 0.2937778                                  | 0.0367476 |                    | 0.2147272     | 0.3728284 |
| diff = mean(phase32) - mean(phase12)     |     |                                            |           | t = 7.9945         |               |           |
| Ho: diff = 0                             |     | Satterthwaite's degrees of freedom = 13.57 |           |                    |               |           |
| Ha: diff < 0                             |     | Ha: diff != 0                              |           | Ha: diff > 0       |               |           |
| Pr(T < t) = 1.0000                       |     | Pr( T  >  t ) = 0.0000                     |           | Pr(T > t) = 0.0000 |               |           |

## 2.2 Phase 3 and 2.

| phase 3 and phase2                                                                                     |     |           |           |           |               |           |
|--------------------------------------------------------------------------------------------------------|-----|-----------|-----------|-----------|---------------|-----------|
| Two-sample t test with unequal variances                                                               |     |           |           |           |               |           |
| Variable                                                                                               | Obs | Mean      | Std. Err. | Std. Dev. | [95%<br>Conf. | Interval] |
| phase3                                                                                                 | 9   | 0.7677778 | 0.0172222 | 0.0516667 | 0.7280633     | 0.8074923 |
| phase2                                                                                                 | 10  | 0.601     | 0.0271805 | 0.0859522 | 0.5395135     | 0.6624865 |
| combined                                                                                               | 19  | 0.68      | 0.0253398 | 0.1104536 | 0.6267631     | 0.7332369 |
| diff                                                                                                   |     | 0.1667778 | 0.0321774 |           | 0.0981789     | 0.2353766 |
| diff = mean(phase32) - mean(phase22)                      t = 5.1831                                   |     |           |           |           |               |           |
| Ho: diff = 0                      Satterthwaite's degrees of freedom = 14.9639                         |     |           |           |           |               |           |
| Ha: diff < 0                      Ha: diff != 0                      Ha: diff > 0                      |     |           |           |           |               |           |
| Pr(T < t) = 0.9999                      Pr( T  >  t ) = 0.0001                      Pr(T > t) = 0.0001 |     |           |           |           |               |           |

## 3. Comparison of CBOD removal efficiencies in phase 1, 2, and 3.

Data:

| CBOD removal efficiency |         |         |         |
|-------------------------|---------|---------|---------|
|                         | Phase 1 | Phase 2 | Phase 3 |
|                         | 71.67%  | 91.67%  | 90.83%  |
|                         | 93.89%  | 91.43%  | 93.00%  |
|                         | 91.58%  | 94.53%  | 88.24%  |
|                         | 91.92%  | 97.64%  | 97.72%  |
|                         | 95.67%  | 95.91%  | 93.33%  |
|                         | 93.10%  | 71.33%  | 69.74%  |
|                         | 92.31%  | 94.54%  | 83.13%  |
|                         |         | 94.47%  | 92.14%  |
|                         |         | 95.56%  | 93.55%  |
|                         |         | 94.88%  | 84.67%  |
| Mean                    | 90.02%  | 92.20%  | 88.64%  |

Stata results:

### 3.1 phase 1 and 2.

codes:  
ttest phase1 == phase2, unpaired unequal

Two-sample t test with unequal variances

| Variable                                                                                               | Obs | Mean     | Std. Err. | Std. Dev. | [95%<br>Conf. | Interval] |
|--------------------------------------------------------------------------------------------------------|-----|----------|-----------|-----------|---------------|-----------|
| phase1                                                                                                 | 7   | 0.9002   | 0.03103   | 0.082097  | 0.824273      | 0.976127  |
| phase2                                                                                                 | 10  | 0.92196  | 0.023905  | 0.075595  | 0.867882      | 0.976038  |
| combined                                                                                               | 17  | 0.913    | 0.018572  | 0.076576  | 0.873629      | 0.952372  |
| diff                                                                                                   |     | -0.02176 | 0.03917   |           | -0.10685      | 0.063326  |
| diff = mean(phase1) - mean(phase2)                      t = -0.5555                                    |     |          |           |           |               |           |
| Ho: diff = 0                      Satterthwaite's degrees of freedom = 12.3382                         |     |          |           |           |               |           |
| Ha: diff < 0                      Ha: diff != 0                      Ha: diff > 0                      |     |          |           |           |               |           |
| Pr(T < t) = 0.2942                      Pr( T  >  t ) = 0.5885                      Pr(T > t) = 0.7058 |     |          |           |           |               |           |
| cannot reject the null hypothesis, diff = 0                                                            |     |          |           |           |               |           |
| we do not find a statistically significant difference in the means of phase 1 and phase 2              |     |          |           |           |               |           |

### 3.2 phases 1 and 3.

. ttest phase1 == phase3, unpaired unequal

Two-sample t test with unequal variances

| Variable | Obs | Mean      | Std. Err. | Std. Dev. | [95%<br>Conf. | Interval] |
|----------|-----|-----------|-----------|-----------|---------------|-----------|
| phase1   | 7   | 0.9002    | 0.0310298 | 0.0820971 | 0.8242729     | 0.9761271 |
| phase3   | 10  | 0.88635   | 0.0251241 | 0.0794493 | 0.8295154     | 0.9431846 |
| combined | 17  | 0.8920529 | 0.0189852 | 0.078278  | 0.8518061     | 0.9322998 |

```

diff                0.01385  0.0399258                0.0725534  0.1002534
diff = mean(phase1) - mean(phase3)                t =  0.3469
Ho: diff = 0                Satterthwaite's degrees of freedom =  12.783

    Ha: diff < 0                Ha: diff != 0                Ha: diff > 0
Pr(T < t) = 0.6328    Pr(|T| > |t|) = 0.7343    Pr(T > t) = 0.3672

we do not find a statistically significant difference in the means of phase 1 and phase
3

```

### 3.3 Phases 2 and 3.

```

. ttest phase2 == phase3, unpaired unequal

Two-sample t test with unequal variances

Variable      Obs   Mean      Std. Err.      Std. Dev.      [95%
                        Conf.      Interval]
phase2         10   0.92196   0.0239053   0.0755952   0.8678824   0.9760376
phase3         10   0.88635   0.0251241   0.0794493   0.8295154   0.9431846
combined        20   0.904155   0.0173647   0.0776571   0.8678104   0.9404996

diff                0.03561  0.0346797                0.0372623  0.1084823

diff = mean(phase2) - mean(phase3)                t =  1.0268
Ho: diff = 0                Satterthwaite's degrees of freedom =  17.9557

    Ha: diff < 0                Ha: diff != 0                Ha: diff > 0
Pr(T < t) = 0.8409    Pr(|T| > |t|) = 0.3181    Pr(T > t) = 0.1591
we do not find a statistically significant difference in the means of phase 2 and
phase 3

```

### 3.4 Comparison of CBOD removal efficiencies to 90% in phases 1, 2 and 3.



phase3                      10    0.88635   0.025124   0.079449   0.829515   0.943185

mean = mean(phase3)

t = -0.5433

Ho: mean = 0.9

degrees of freedom =    9

Ha: mean < 0.9

Ha: mean != 0.9

Ha: mean > 0.9

Pr(T < t) = 0.3001

Pr(|T| > |t|) = 0.6001

Pr(T > t) = 0.6999

cannot reject the null hypothesis, the mean of phase  
=90%
